# Supplementary material
Source: PubMed Central journal article supplement (PMC9906333)

**eFigure 1. Survey sampling scheme**

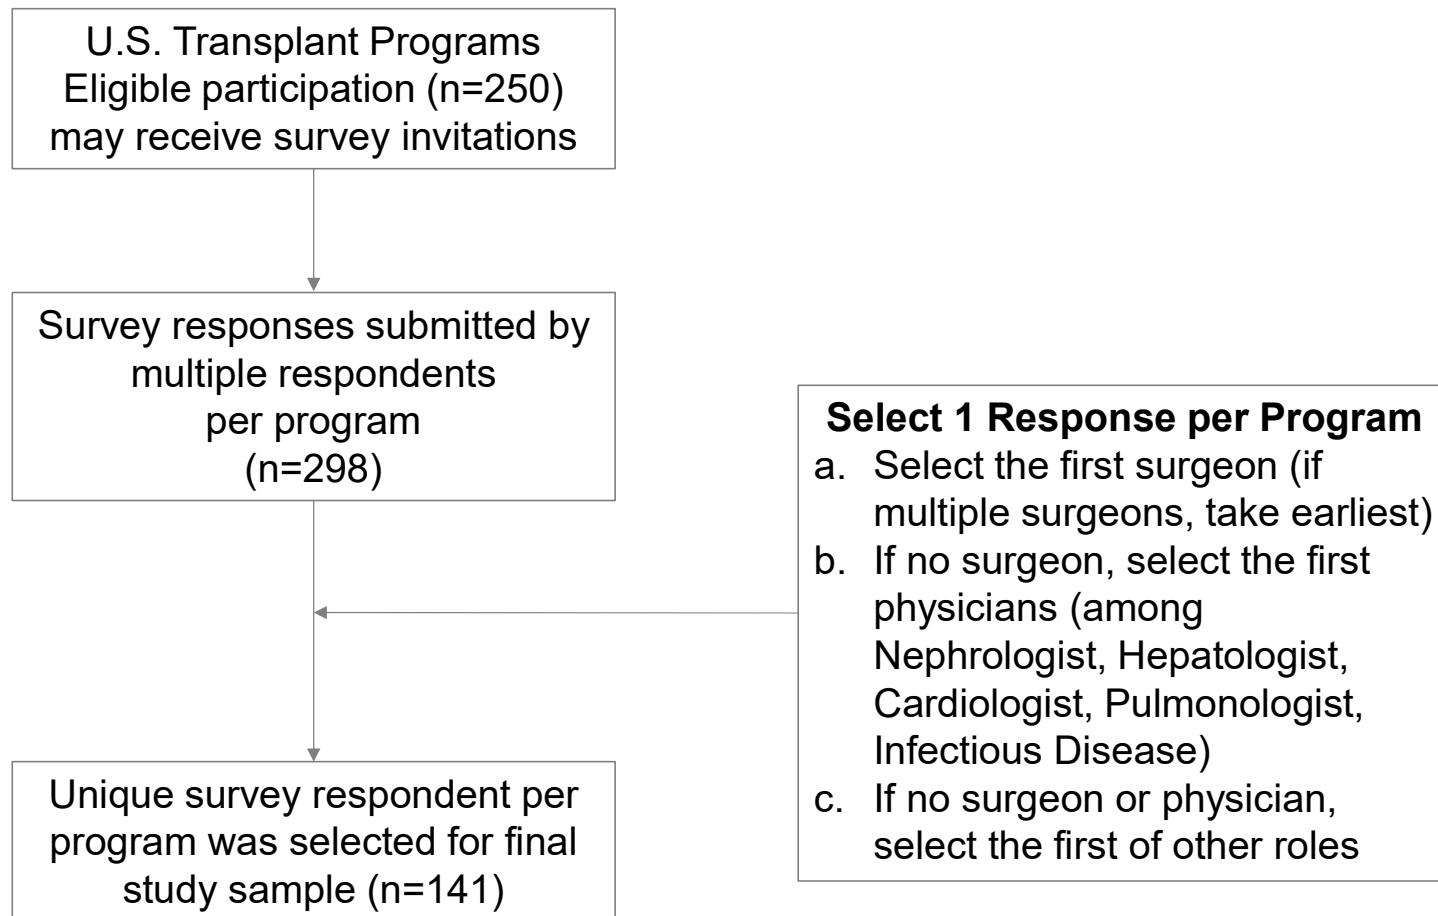

Supplement: mmc1-sup1-figs1.pdf [file mmc1-sup1-figs1.pdf]
